# Supplementary material for: Transcriptional mechanism for the paired miR-433 and miR-127 genes by nuclear receptors SHP and ERRγ
Source: PubMed Central journal article supplement — Nucleic Acids Res. 2008 Sep 6;36(18):5727–35. doi: 10.1093/nar/gkn567 (PMC2566885; doi:10.1093/nar/gkn567), 2008-09-06
Supplement: gkn567_1.pdf [file gkn567_1.pdf]

## Supplementary Figure Legend

**Figure S1. Microarray analysis of differential expression of miRNAs in livers of SHP<sup>-/-</sup> mice as compared to wild-type mice.** Total RNA containing miRNAs was isolated using RNeasy Mini Kit (Qiagen, Valencia CA) from livers of 2 month old male mice and were subjected to microarray analysis. The microarray analysis was conducted in LC Sciences, Houston, TX. Please refer to materials and methods section for detailed description.

**Supp. Table S1 Differentially expressed miRNAs in SHP<sup>-/-</sup> mice (sample B signal) as compared to the wild type mice (Sample A signal).** The fold induction (sample B/sample A) is presented as Log2.

**Figure S2. Gene expression analysis. A,** Semi-quantitative RT-PCR analysis of ERR $\alpha$  and ERR $\beta$  mRNA in Nmuli and Hepa-1 cells. ERR $\beta$  expression was detected using higher PCR cycles. **B,** Transient transfection assays to determine ERR $\beta$  regulation of miR-433 and miR-127 promoter (pro.) transactivation. Hela cells were transfected with the -1392miR-433Luc or -1513miR-127Luc in the presence of ERR $\beta$  expression plasmid (50, 100, 200 ng). Luciferase (luc.) activities (act.) were normalized by  $\beta$ -gal activities. **C,** Semi-quantitative RT-PCR analysis of ERR $\gamma$  mRNA in Hepa-1 cells transfected with control (con) or siRNA-ERR $\gamma$ . Total RNA was isolated and used for RT-PCR analysis.

**Figure S3.** Transient transfection assays to determine LRH-1 regulation of miR-433 and miR-127 promoter (pro.) transactivation. Hela cells were transfected with the -1392miR-433Luc or -1513miR-127Luc in the presence of LRH-1 expression plasmid (50, 100, 200 ng). Luciferase (luc.) activities (act.) were normalized by  $\beta$ -gal activities.

**Table S2. Primer sequences used for deletion construct, CHIP assays and gel shift assays.**

Microarray analysis of differential expression of miRNAs in livers of SHP<sup>-/-</sup> mice

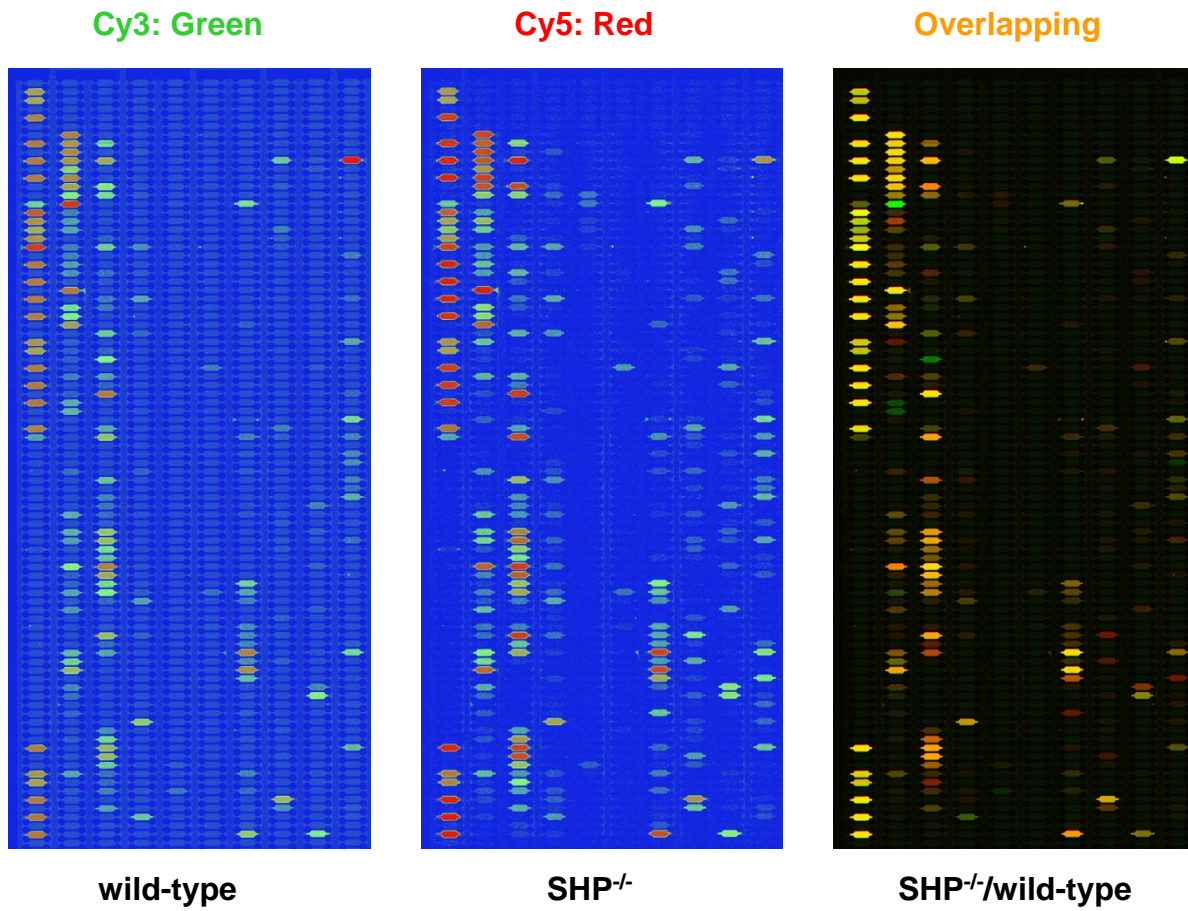

The images are displayed in pseudo colors so as to expand visual dynamic range.

Table 1 Call list (differentially expressed transcripts with p-value < 0.01)

| No. | Probe_ID   | Sample A Signal | Sample B Signal | log <sub>2</sub> (Sample B / Sample A) |
|-----|------------|-----------------|-----------------|----------------------------------------|
| 1   | miR-1      | 67,147.65       | 51.89           | -10.31                                 |
| 2   | miR-206    | 10,156.98       | 18.37           | -9.07                                  |
| 3   | miR-1      | 381.65          | 1.00            | -8.58                                  |
| 4   | miR-133b   | 4,132.36        | 12.74           | -8.38                                  |
| 5   | miR-133a   | 3,344.82        | 14.07           | -7.87                                  |
| 6   | miR-337    | 1.61            | 153.61          | 6.76                                   |
| 7   | miR-376b   | 48.12           | 4,317.04        | 6.65                                   |
| 8   | miR-434-5p | 7.55            | 259.51          | 5.67                                   |
| 9   | miR-431    | 2.86            | 109.71          | 5.66                                   |
| 10  | miR-376b   | 77.58           | 3,804.39        | 5.63                                   |
| 11  | miR-376b*  | 6.46            | 133.41          | 5.24                                   |
| 12  | miR-485-5p | 5.62            | 97.55           | 4.93                                   |
| 13  | miR-543    | 13.69           | 362.90          | 4.65                                   |
| 14  | miR-300    | 7.51            | 141.61          | 4.55                                   |
| 15  | miR-383    | 6.79            | 123.13          | 4.22                                   |
| 16  | miR-134    | 30.23           | 385.19          | 3.80                                   |
| 17  | miR-205    | 272.63          | 19.22           | -3.77                                  |
| 18  | miR-434-3p | 88.64           | 1,253.16        | 3.77                                   |
| 19  | miR-379    | 77.48           | 1,008.08        | 3.76                                   |
| 20  | miR-154*   | 37.20           | 473.55          | 3.67                                   |
| 21  | miR-381    | 12.95           | 153.18          | 3.56                                   |
| 22  | miR-127    | 253.82          | 2,765.78        | 3.45                                   |
| 23  | miR-494    | 57.05           | 586.07          | 3.44                                   |
| 24  | miR-30e-5p | 497.24          | 5,433.71        | 3.39                                   |
| 25  | miR-495    | 54.17           | 560.75          | 3.35                                   |
| 26  | miR-127    | 300.55          | 2,789.20        | 3.28                                   |
| 27  | miR-154    | 66.19           | 604.23          | 3.19                                   |
| 28  | miR-409    | 34.77           | 283.32          | 3.12                                   |
| 29  | miR-411    | 62.83           | 529.29          | 3.12                                   |
| 30  | miR-541    | 193.04          | 1,669.47        | 3.11                                   |
| 31  | miR-409-3p | 48.91           | 364.28          | 2.90                                   |
| 32  | miR-494    | 78.73           | 599.65          | 2.89                                   |
| 33  | miR-801    | 372.06          | 61.84           | -2.71                                  |

Table 1 Call list (differentially expressed transcripts with p-value < 0.01)

|    |            |           |           |       |
|----|------------|-----------|-----------|-------|
| 34 | miR-495    | 96.22     | 594.61    | 2.65  |
| 35 | miR-485-3p | 57.11     | 333.70    | 2.61  |
| 36 | miR-379    | 278.81    | 1,631.27  | 2.59  |
| 37 | miR-292-5p | 43.69     | 245.79    | 2.58  |
| 38 | miR-433    | 22.24     | 125.13    | 2.49  |
| 39 | miR-424    | 16.41     | 89.59     | 2.49  |
| 40 | miR-346    | 130.89    | 22.13     | -2.45 |
| 41 | miR-134    | 55.72     | 320.60    | 2.45  |
| 42 | miR-299-5p | 119.58    | 675.59    | 2.44  |
| 43 | miR-455    | 41.11     | 205.04    | 2.39  |
| 44 | miR-149    | 341.20    | 67.84     | -2.36 |
| 45 | miR-224    | 200.93    | 40.93     | -2.36 |
| 46 | miR-486    | 6,125.81  | 1,173.02  | -2.33 |
| 47 | miR-224    | 208.50    | 43.04     | -2.33 |
| 48 | miR-680    | 240.22    | 1,188.95  | 2.29  |
| 49 | miR-409-3p | 70.17     | 342.20    | 2.29  |
| 50 | miR-10b    | 141.55    | 29.91     | -2.27 |
| 51 | miR-382    | 97.46     | 426.19    | 2.22  |
| 52 | miR-689    | 1,255.56  | 5,867.83  | 2.20  |
| 53 | miR-290    | 166.17    | 724.78    | 2.18  |
| 54 | miR-329    | 74.67     | 323.18    | 2.17  |
| 55 | miR-29b    | 605.41    | 2,682.28  | 2.15  |
| 56 | miR-327    | 54.46     | 240.36    | 2.15  |
| 57 | miR-485-3p | 92.77     | 406.16    | 2.14  |
| 58 | miR-802    | 40.12     | 175.00    | 2.12  |
| 59 | miR-101    | 2,324.57  | 10,157.48 | 2.12  |
| 60 | miR-667    | 42.67     | 176.36    | 2.10  |
| 61 | miR-150    | 3,136.49  | 723.57    | -2.07 |
| 62 | miR-709    | 70,678.16 | 17,201.15 | -2.07 |
| 63 | miR-768-5p | 133.18    | 30.20     | -2.06 |
| 64 | miR-382    | 98.50     | 398.37    | 2.05  |
| 65 | miR-712*   | 103.92    | 25.02     | -2.05 |

Table 1 Call list (differentially expressed transcripts with p-value < 0.01)

|    |            |           |           |       |
|----|------------|-----------|-----------|-------|
| 66 | miR-200c   | 872.94    | 224.21    | -1.95 |
| 67 | miR-721    | 44.31     | 180.42    | 1.93  |
| 68 | miR-29c    | 3,150.87  | 11,683.73 | 1.92  |
| 69 | miR-106a   | 89.12     | 339.00    | 1.88  |
| 70 | miR-128b   | 249.85    | 78.28     | -1.67 |
| 71 | miR-203    | 5,684.93  | 1,799.11  | -1.62 |
| 72 | miR-19b    | 739.85    | 2,230.08  | 1.59  |
| 73 | miR-128a   | 235.49    | 75.34     | -1.58 |
| 74 | miR-203    | 6,314.29  | 2,146.83  | -1.54 |
| 75 | miR-350    | 92.27     | 273.99    | 1.52  |
| 76 | miR-199a*  | 6,390.63  | 2,374.22  | -1.47 |
| 77 | miR-20b    | 70.91     | 206.39    | 1.42  |
| 78 | miR-148b   | 271.30    | 714.08    | 1.40  |
| 79 | miR-350    | 149.49    | 404.54    | 1.37  |
| 80 | miR-101b   | 4,638.18  | 11,096.06 | 1.28  |
| 81 | miR-378    | 332.39    | 136.20    | -1.27 |
| 82 | miR-194    | 12,287.75 | 28,089.56 | 1.20  |
| 83 | miR-140*   | 1,146.25  | 517.20    | -1.20 |
| 84 | miR-22*    | 602.92    | 1,441.48  | 1.16  |
| 85 | miR-140*   | 1,175.16  | 556.80    | -1.13 |
| 86 | miR-20b    | 171.66    | 375.96    | 1.13  |
| 87 | miR-30a-5p | 6,966.59  | 15,160.28 | 1.11  |
| 88 | miR-181b   | 425.17    | 198.57    | -1.11 |
| 89 | miR-214    | 3,113.72  | 1,532.29  | -1.08 |
| 90 | miR-148a   | 11,582.28 | 24,235.55 | 1.06  |
| 91 | miR-365    | 525.34    | 1,105.08  | 1.06  |
| 92 | miR-22     | 5,236.78  | 10,947.64 | 1.03  |
| 93 | miR-200b   | 1,017.34  | 505.19    | -1.01 |
| 94 | miR-15b    | 6,873.48  | 3,423.22  | -0.98 |
| 95 | miR-805    | 7,192.68  | 3,706.68  | -0.96 |
| 96 | miR-151*   | 3,893.46  | 2,137.01  | -0.91 |
| 97 | miR-20b    | 305.41    | 605.81    | 0.88  |

Table 1 Call list (differentially expressed transcripts with p-value < 0.01)

|     |            |           |           |       |
|-----|------------|-----------|-----------|-------|
| 98  | miR-130a   | 1,105.17  | 2,049.36  | 0.88  |
| 99  | miR-132    | 296.31    | 162.59    | -0.87 |
| 100 | miR-181a   | 629.01    | 342.90    | -0.86 |
| 101 | miR-361    | 3,184.04  | 1,729.75  | -0.80 |
| 102 | miR-192    | 15,713.78 | 26,640.37 | 0.78  |
| 103 | miR-690    | 11,639.25 | 6,781.73  | -0.76 |
| 104 | miR-215    | 18,010.01 | 29,983.84 | 0.75  |
| 105 | miR-29a    | 18,258.01 | 30,052.68 | 0.74  |
| 106 | miR-192    | 22,772.33 | 37,675.50 | 0.72  |
| 107 | miR-422b   | 4,555.13  | 2,722.30  | -0.71 |
| 108 | miR-455-3p | 1,666.36  | 2,589.62  | 0.68  |
| 109 | miR-320    | 2,951.04  | 1,819.33  | -0.66 |
| 110 | miR-638    | 8,126.84  | 5,107.22  | -0.66 |
| 111 | miR-30d    | 5,880.75  | 9,312.64  | 0.66  |
| 112 | miR-422b   | 2,795.98  | 1,790.44  | -0.64 |
| 113 | miR-139    | 588.72    | 917.19    | 0.64  |
| 114 | miR-30b    | 19,003.24 | 29,439.75 | 0.63  |
| 115 | miR-185    | 3,217.91  | 2,237.19  | -0.59 |
| 116 | miR-705    | 8,865.73  | 5,930.87  | -0.55 |
| 117 | miR-30c    | 19,039.96 | 27,920.45 | 0.54  |
| 118 | miR-143    | 4,101.38  | 2,803.29  | -0.54 |
| 119 | miR-10a    | 2,129.88  | 1,425.42  | -0.53 |
| 120 | miR-20a    | 2,879.69  | 2,023.63  | -0.50 |
| 121 | miR-762    | 3,941.27  | 2,941.01  | -0.44 |
| 122 | let-7i     | 11,725.04 | 8,736.17  | -0.43 |
| 123 | miR-145    | 3,923.86  | 2,948.94  | -0.41 |
| 124 | miR-146a   | 2,667.98  | 3,517.83  | 0.39  |
| 125 | miR-92     | 6,723.34  | 5,211.18  | -0.38 |
| 126 | miR-15a    | 4,498.92  | 5,715.29  | 0.34  |
| 127 | miR-125b   | 10,261.10 | 8,025.18  | -0.33 |
| 128 | let-7f     | 29,555.56 | 25,302.09 | -0.30 |
| 129 | miR-27b    | 10,827.38 | 13,371.28 | 0.29  |
| 130 | miR-27a    | 7,770.33  | 9,500.11  | 0.28  |

Table 1 Call list (differentially expressed transcripts with p-value < 0.01)

|     |         |           |           |       |
|-----|---------|-----------|-----------|-------|
| 131 | miR-23b | 18,670.74 | 22,351.51 | 0.27  |
| 132 | miR-25  | 5,179.74  | 4,310.32  | -0.27 |
| 133 | miR-16  | 18,476.54 | 22,110.85 | 0.26  |
| 134 | miR-451 | 19,072.96 | 16,157.59 | -0.26 |
| 135 | let-7a  | 32,847.16 | 27,220.94 | -0.26 |
| 136 | let-7a  | 34,817.95 | 29,595.25 | -0.24 |
| 137 | let-7b  | 29,478.58 | 25,041.91 | -0.21 |
| 138 | let-7c  | 32,340.91 | 28,544.86 | -0.18 |
| 139 | let-7d  | 29,531.11 | 25,140.39 | -0.18 |
| 140 | miR-126 | 26,959.59 | 23,789.78 | -0.18 |
| 141 | miR-23a | 17,555.25 | 19,556.66 | 0.17  |
| 142 | let-7g  | 25,192.88 | 28,360.12 | 0.15  |
| 143 | let-7f  | 32,147.00 | 29,492.12 | -0.13 |

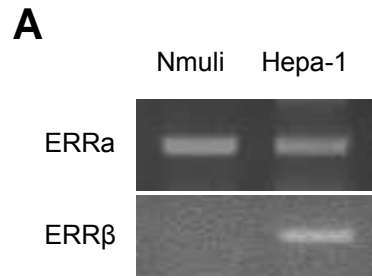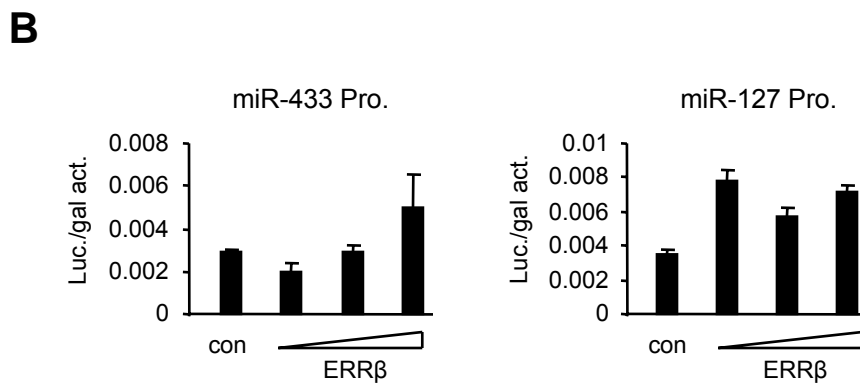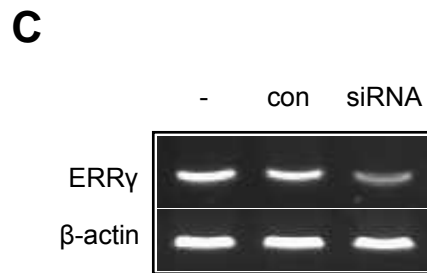



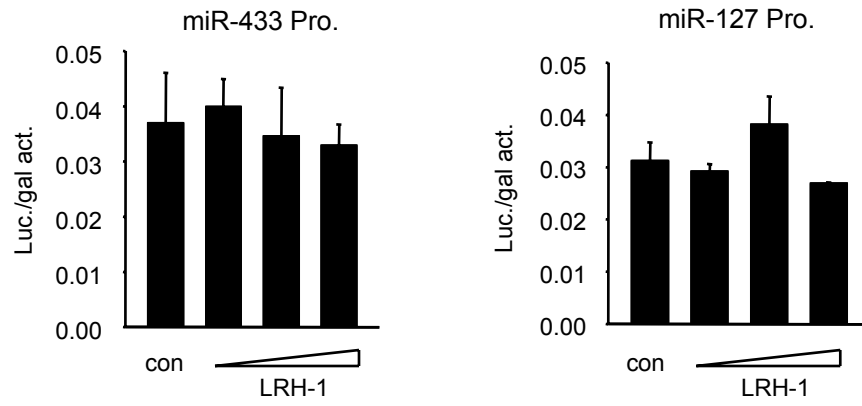

(LRH-1 dose: 50, 100, 200ng)

## Primer sequences used for deletion constructs, ChIP assays, and gel shift assays

### miR-433Luc deletion constructs

|          |                                 |
|----------|---------------------------------|
| -1088Luc | 5'-GACAGTTAGGACAGTTAGGGTTACACAG |
| -622Luc  | 5'- CAGGAAAAGCTCAGCCAGCTCT      |
| -328Luc  | 5'- CACTTCCAAATTAGGGCAGG        |
| -92Luc   | 5'- GACTCTTCCAGTAGAGCAGGCCACGGA |
| Reverse  | 5'- GAGCTACTGGCTGCCATCCCGATG    |

### miR-127Luc deletion constructs

|         |                              |
|---------|------------------------------|
| -990Luc | 5'-GCCCTAATGGACATAAGCAGCAGT  |
| -713Luc | 5'-GAAGGATCCTCATCTCCACTCGA   |
| -508Luc | 5'-CTTCAGGGATTCCAAGGCCTCC    |
| -287Luc | 5'-GGGATATGTTGAAGCCCAAGAT    |
| Reverse | 5'-CAGAGAGGTCCTGGTCTACTCAATG |

### ChIP assays

|       |                              |
|-------|------------------------------|
| E2-F  | 5'-GAAAGCATGGAACACAGCACCTTG  |
| E2-R  | 5'-TGAGACCAATGAGGAGAGAGCAGTG |
| E1'-F | 5'-CTTCAGGGATTCCAAGGCCTCCTGC |
| E1'-R | 5'-CAGAGAGGTCCTGGTCTACTCAATG |

|                       |                               |
|-----------------------|-------------------------------|
| ERRa Distance Forward | 5'- CCACAGAGTGGGCAGACAGTAAG   |
| ERRa Distance Reverse | 5'- CAGACCCTGGCACAACCTAACCAC  |
| ERRa ChIP Forward     | 5'- AGAGTCTATGCATGGTCCCAGAGTC |
| ERRa ChIP Reverse     | 5'- TGGTAGATCAGCACCCCTGAGGAC  |

|                                          |                           |
|------------------------------------------|---------------------------|
| miR-127 Promoter distance primer forward | 5'-GACACTCAGTGTGCCTTCTC   |
| miR-127 Promoter distance primer reverse | 5'-GTAAGAGAACATTCCACAGACC |

## Primer sequences used for deletion constructs, ChIP assays, and gel shift assays

### miR-433 gel shift

|             |                                                                      |
|-------------|----------------------------------------------------------------------|
| E2-F        | 5'- GTGTAGAGGTAGAAGTCCGTGGAGCACCCAAGGTCAGT<br>GTCCCAGGATGCACAGGTGGCC |
| E2-R        | 5'- GGCCACCTGTGCATCCTGGGACACTGACCTTGGGTGCT<br>CCACGGACTTCTACCTCTACAC |
| E2-F<br>mut | 5'- GTGTAGAGGTAGAAGTCCGTGGAGCACCCGTGTCC<br>CAGGATGCACAGGTGGCC        |
| E2-R<br>mut | 5'- GGCCACCTGTGCATCCTGGGACACGGGTGCTCCAC<br>GGACTTCTACCTCTACAC        |
| E1-F        | 5'- TCTGGGTCCAAAAGATTTCTGGTCTGAAGGTGACCGCTTCTGGTC<br>GCCAAACAGGTCC   |
| E1-R        | 5'- GGACCTGTTTGGCGACCAGGAAGCGGTACCTTCA<br>GACCACGAAATCTTTGGACCCAGA   |
| E1-F<br>mut | 5'- TCTGGGTCCAAAAGATTTCTGGTCTGTGACCGCTTCTGGTC<br>GCCAAACAGGTCC       |
| E1-F<br>mut | 5'- GGACCTGTTTGGCGACCAGGAAGCGGTACAGAC<br>CACGAAATCTTTGGACCCAGA       |

### miR-127 gel shift

|              |                                                                     |
|--------------|---------------------------------------------------------------------|
| E2'-F        | 5'-ACGAAGTGGCGATAGGGATAGACAAGGTCAATCACACTTTG<br>AAGACACCTCCTGCTGCCA |
| E2'-R        | 5'-TGGCAGCAGGAGGTGTCTTCAAAGTGTGATTGACCTTGTCTA<br>TCCCTATCGCCACTTCGT |
| E2'-F<br>mut | 5'-ACGAAGTGGCGATAGGGATAGAATCACACTTTGAAGACAC<br>CTCCTGCTGCCAGGGACAGG |
| E2'-R<br>mut | 5'-CCTGTCCCTGGCAGCAGGAGGTGTCTTCAAAGTGTGATTCT<br>ATCCCTATCGCCACTTCGT |
| E1'-F        | 5'-CGACTTGCGGAAAGCCCTCTTCAGGGATTCCAAGGCCTCCTGC<br>TCTCTTCTCCCCAGTA  |
| E1'-R        | 5'-TACTGGGGAGAAGAGGAGCAGGAGGCCTTGAATCCCT<br>GAAGAGGGCTTTCCGCAAGTCG  |
| E1'-F<br>mut | 5'-CGACTTGCGGAAAGCCCTCTTCAGGCCTCCTGCTCCTCTT<br>CTCCCCAGTA           |
| E1'-F<br>mut | 5'- TACTGGGGAGAAGAGGAGCAGGAGGCCTGAAGAGGG<br>CTTTCCGCAAGTCG          |
